# Supplementary material for: Pulmonary Targeting of Levofloxacin Using Microsphere-Based Dry Powder Inhalation
Source: MDPI journal article supplement (doi:10.3390/ph15050560), 2022-04-30
Supplement: s1 [file s1]

Supplementary Figure S1: Particle size distribution of optimized LVX-loaded microspheres

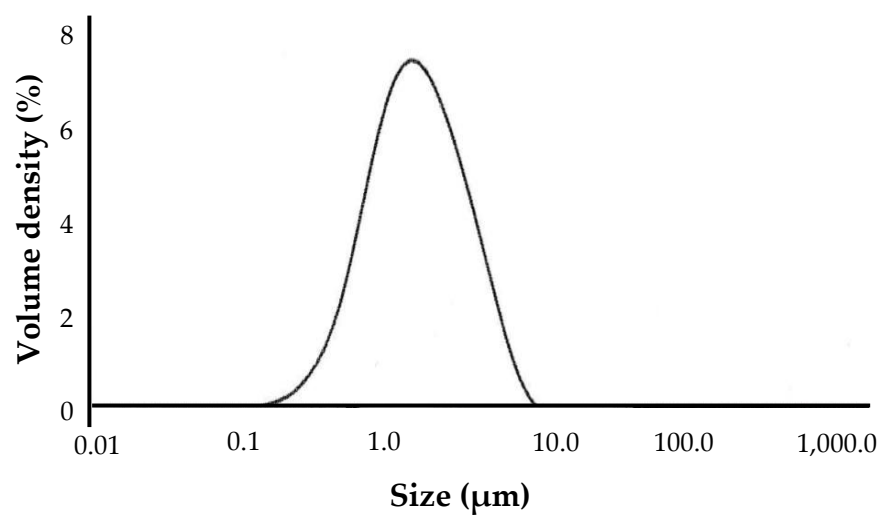

**Supplementary Figure S2: “Nose-only” inhalation apparatus used for administering inhalable microparticles to mice.**

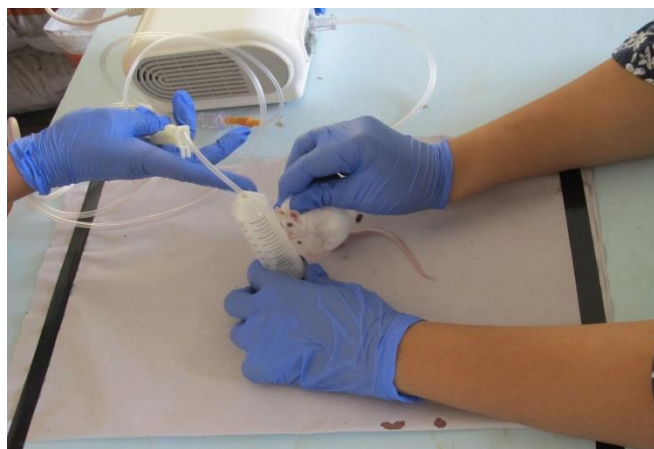

The delivery chamber consisted of a 50-ml plastic centrifuge tube with a hole of ~0.5 cm diameter at a distance of about 2.5 cm from the rim. The powder for inhalation was weighed in the cap. A length of tubing (i.d. ~ 2mm) was inserted into the tube from the apex of the taper (through another orifice) to a clearance of about 2.5–5mm from the inner surface of the cap. The tubing was connected to the air pump to admit a turbulent air stream, at a constant rate, for fluidizing the powder for 60 seconds. The home-made nose-only inhalation exposure apparatus was validated for delivering equal doses of microspheres as follows:

- 1- The nose-only inhalation exposure apparatus was primed with a few blank runs before using for in vivo experiment to nullify the possibility of administered dose loss by adsorption of aerosolized particles on the surface of the inhalation chamber.
- 2- After priming the inhalation apparatus, a constant weight of free drug or drug loading microspheres were charged into the inhalation apparatus.
- 3- A vacuum pump operating at low voltage was adopted to fluidize the powder bed in the plastic centrifuge tube (inhalation apparatus) for a constant period (60 sec.)
- 4- After the end of inhalation time, the remaining dose in the inhalation chamber was collected, weighed and the drug content was estimated.

**Supplementary Table S1: Levofloxacin amount deposited into different stages of Anderson Cascade**

| Cascade impactor stages | Amount deposited (µg) |                         |
|-------------------------|-----------------------|-------------------------|
|                         | Pure LVX              | LVX-loaded microspheres |
| Device                  | 0.81 ± 0.04           | 2.16 ± 0.14             |
| Capsule                 | 2.5 ± 0.7             | 2.52 ± 0.17             |
| Mouth piece             | 10.2 ± 1.10           | 3.03 ± 0.21             |
| Induction port          | 10.8 ± 0.99           | 4.16 ± 0.51             |
| Pre-separator           | 6.20 ± 0.45           | 3.50 ± 0.22             |
| Stage 1                 | 15.76 ± 1.12          | 9.38 ± 0.61             |
| Stage 2                 | 12.29 ± 1.07          | 8.50 ± 0.45             |
| Stage 3                 | 12.20 ± 0.98          | 11.10 ± 0.76            |
| Stage 4                 | 13.98 ± 1.31          | 12.21 ± 0.81            |
| Stage 5                 | 8.72 ± 0.75           | 11.10 ± 0.91            |
| Stage 6                 | 6.07 ± 0.34           | 15.63 ± 1.21            |
| Stage 7                 | 0.455 ± 0.01          | 17.13 ± 1.40            |
| Stage filter            | 0.001 ± 0.00          | 0.001 ± 0.00            |
